# Supplementary material
Source: Copernicus journal article supplement (doi:10.5194/hess-30-3575-2026)
Supplement: Supplementary file 1 [file hess-30-3575-2026-supplement.pdf]

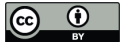

*Supplement of*

## **Decoding multicomponent hydrochemical anomalies: a synergistic detection model for earthquake forecasting**

**W. Shao et al.**

*Correspondence to:* Ying Li ([liying@ief.ac.cn](mailto:liying@ief.ac.cn)) and Xiaocheng Zhou ([zhouxiaocheng188@163.com](mailto:zhouxiaocheng188@163.com))

The copyright of individual parts of the supplement might differ from the article licence.

## Supplementary Information for Figure

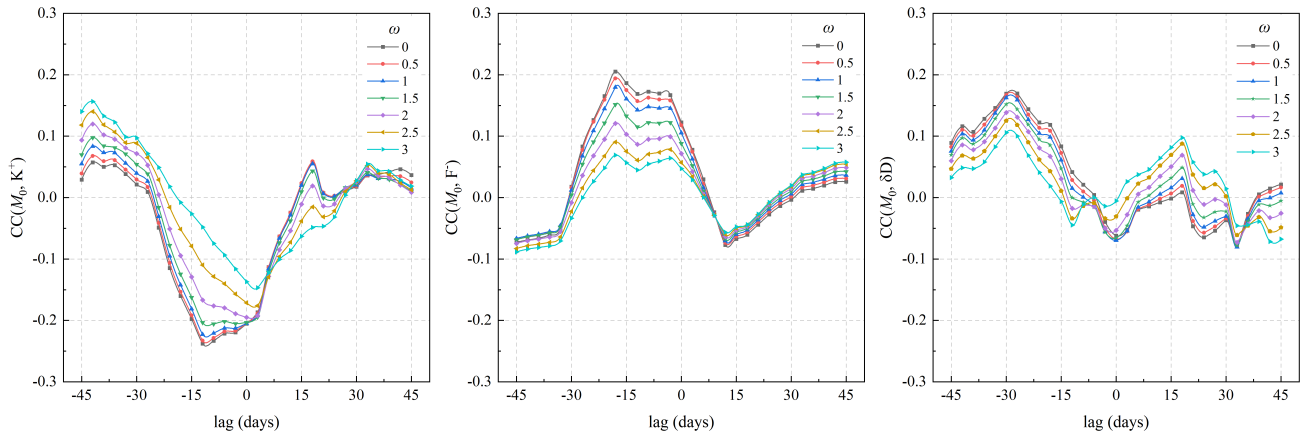

**Figure S1: Cross-correlation function analysis of the 15-day moving average time series ( $K^+$ ,  $F^-$ ,  $\delta D$ ) and distance-corrected seismic moment for multiple  $\omega$  values (including 0, 0.5, 1, 1.5, 2, 2.5, and 3).**

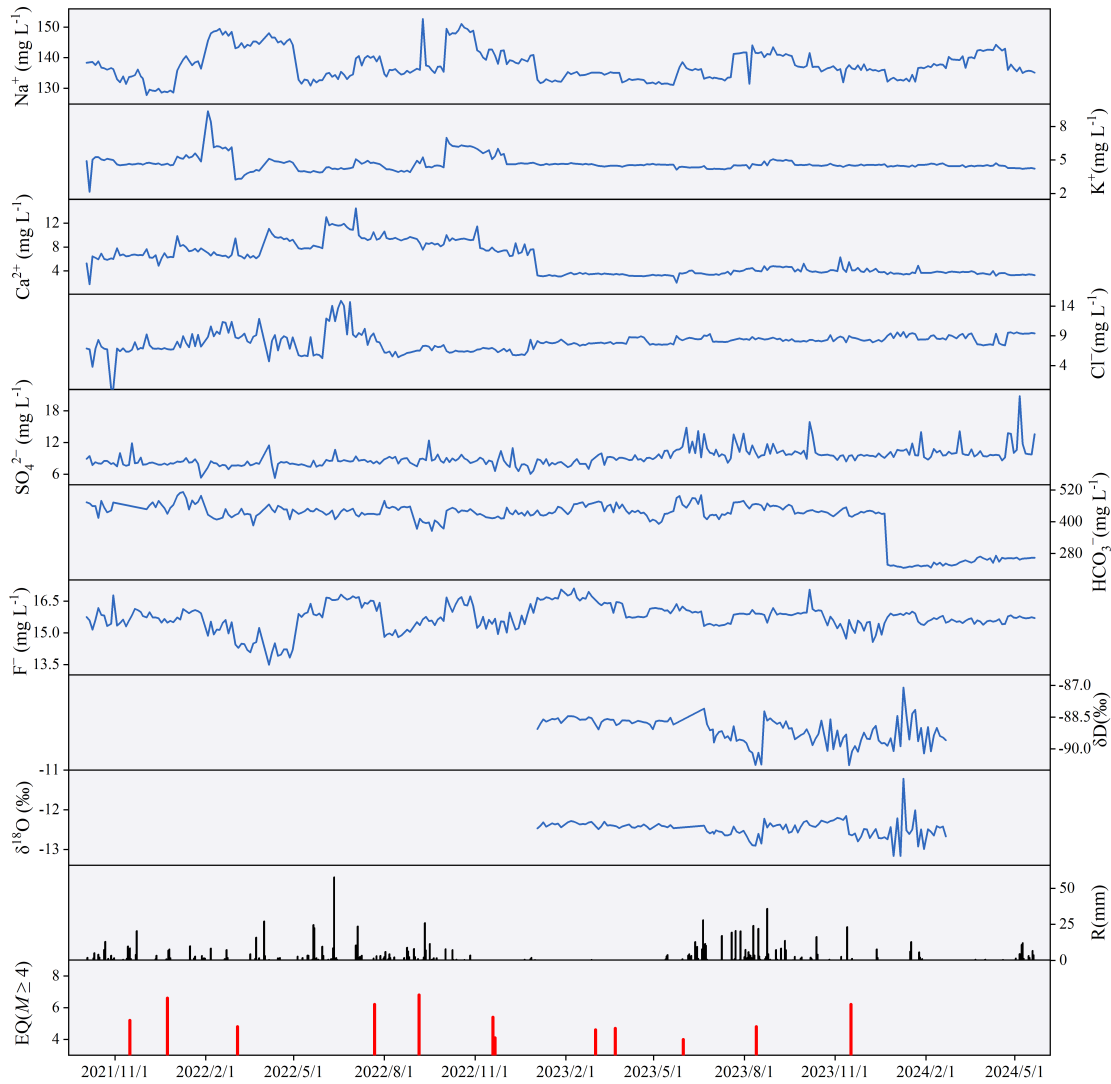

**Figure S2: Time series of hydrochemical components ( $Na^+$ ,  $K^+$ ,  $Ca^{2+}$ ,  $Cl^-$ ,  $SO_4^{2-}$ ,  $HCO_3^-$ ,  $F^-$ ,  $\delta D$ , and  $\delta^{18}O$ ), alongside corresponding rainfall and earthquake events for Wana spring.**

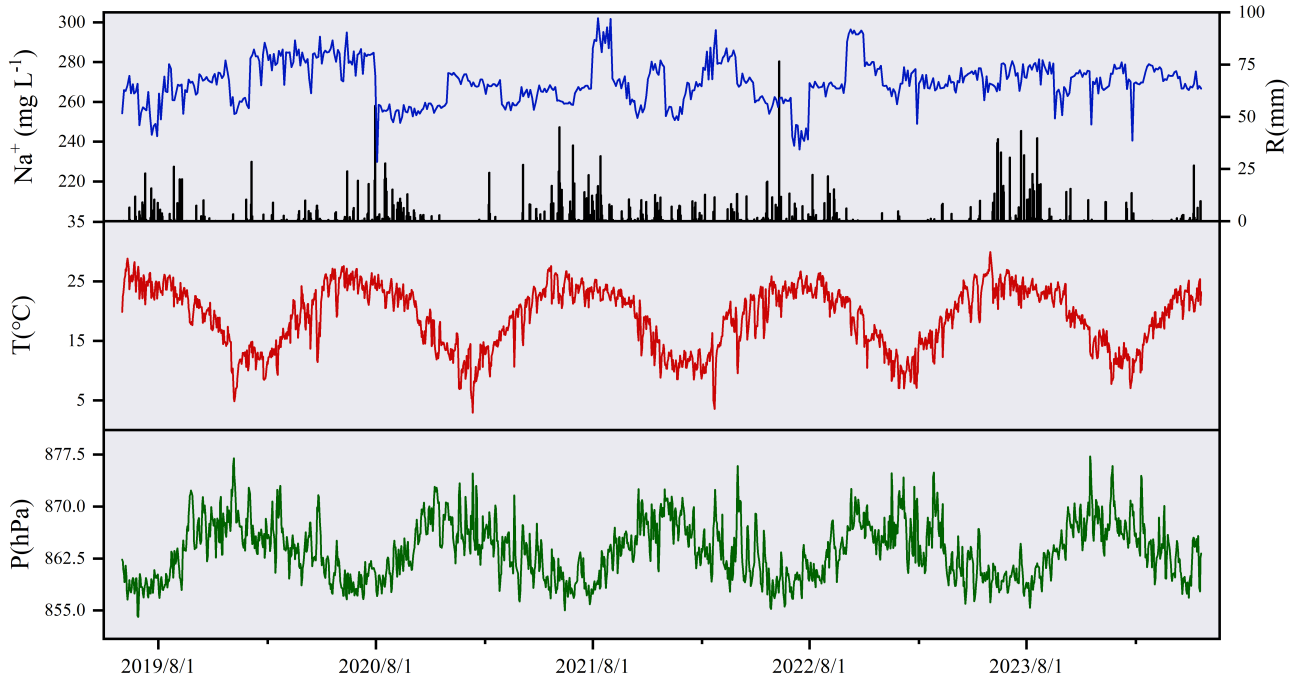

Figure S3: Time series of  $\text{Na}^+$ , alongside corresponding rainfall (R), temperature (T), and atmospheric pressure (P) for Qujiang spring.

40

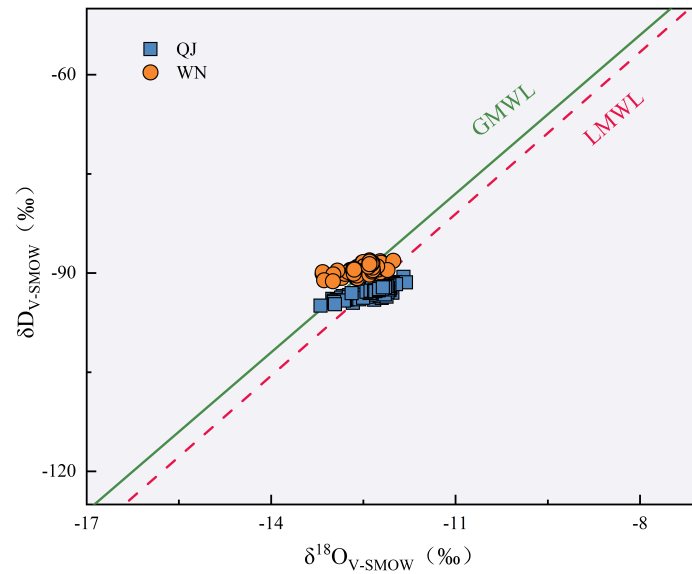

Figure S4: Plot of  $\delta\text{D}$  versus  $\delta^{18}\text{O}$  for thermal springs. GMWL: Global Meteoric Water Line (Craig, 1961); LMWL: Local Meteoric Water Line (Li et al, 2016).

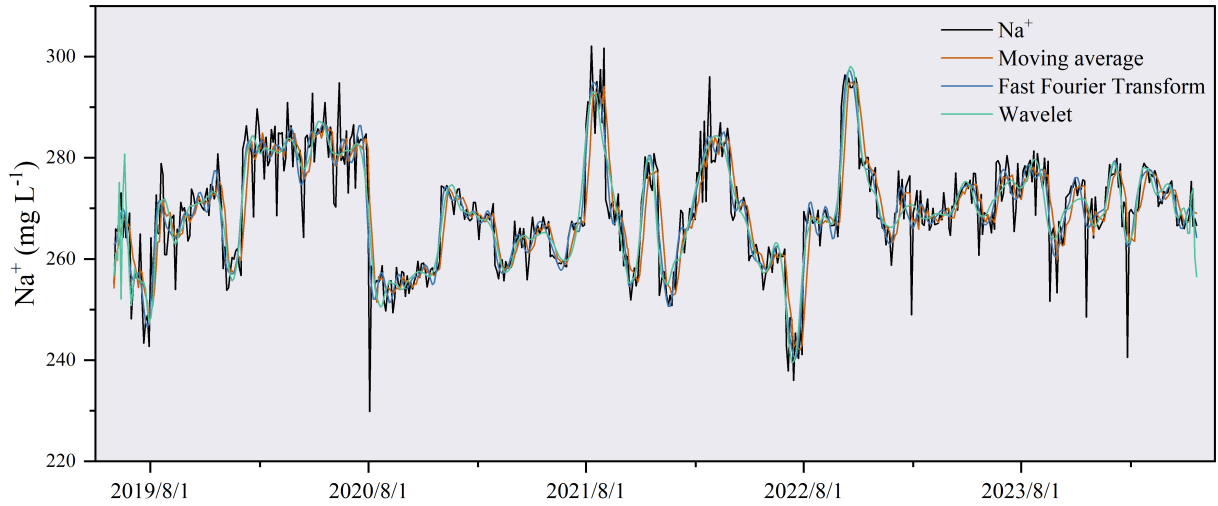

45 **Figure S5: Comparison of denoising results using 15-day moving average, Fast Fourier Transform, and 3-level Wavelet (using DB5 wavelet with 20 % threshold).**

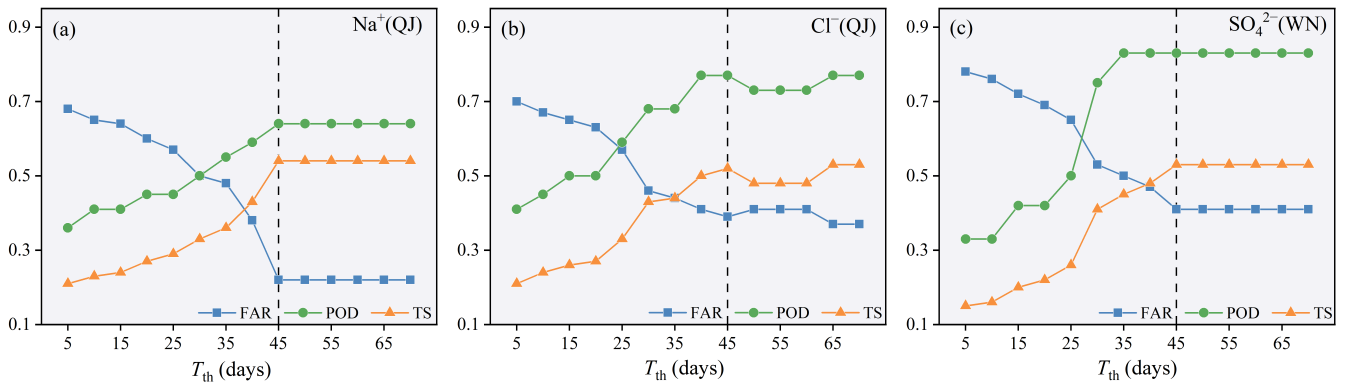

**Figure S6: Variations in the false alarm rate (FAR), probability of detection (POD), and threat score (TS) as a function of the seismic response time threshold ( $T_{th}$ ).**

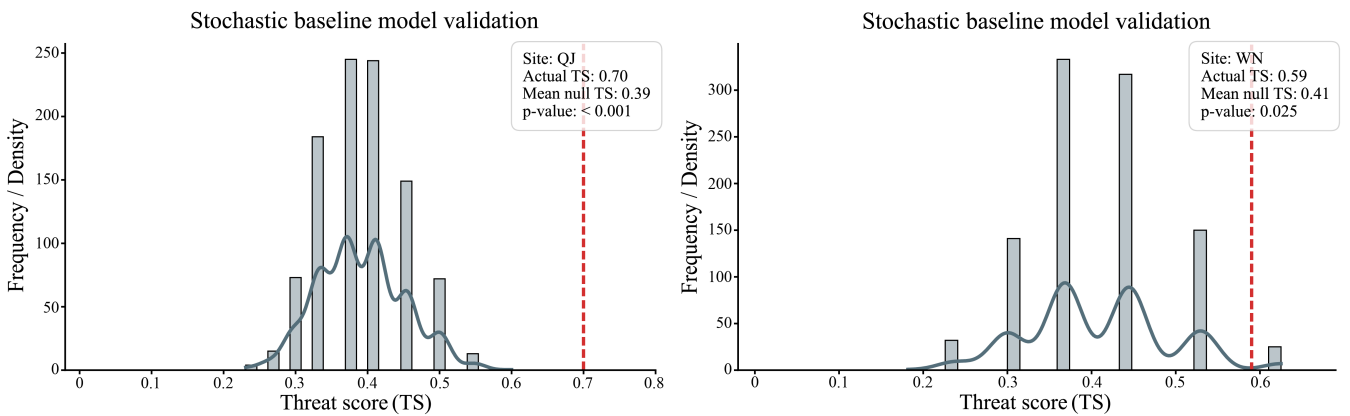

50

**Figure S7: Statistical significance and model performance reliability validation. The histograms illustrate the TS distribution of the stochastic baseline model (1,000 Monte Carlo iterations), while the red dashed lines mark the actual performance of the proposed model at sites Qujiang (QJ) and Wana (WN) springs, respectively.**

55 **Supplementary Information for Table****Table S1: Catalog of earthquakes meeting the selection criteria during the thermal spring monitoring period.**

| Date       | Lon.   | Lat.  | Depth<br>(km) | $M$ | $\Delta$ (km) |     | Response sites |
|------------|--------|-------|---------------|-----|---------------|-----|----------------|
|            |        |       |               |     | QJ            | WN  |                |
| 2019/06/24 | 101.64 | 24.93 | 10            | 5.2 | 161           | —   | QJ             |
| 2019/08/31 | 101.95 | 23.34 | 13            | 4.3 | 109           | —   | QJ             |
| 2019/11/01 | 102.79 | 24.39 | 13            | 4.0 | 51            | —   | QJ             |
| 2020/01/15 | 103.12 | 25.55 | 8             | 4.8 | 182           | —   | QJ             |
| 2020/01/23 | 101.86 | 23.37 | 15            | 4.0 | 115           | —   | QJ             |
| 2020/04/11 | 101.89 | 23.67 | 12            | 4.1 | 97            | —   | QJ             |
| 2020/06/16 | 102.72 | 22.64 | 9             | 5.2 | 144           | —   | QJ             |
| 2020/07/12 | 102.52 | 22.86 | 11            | 4.8 | 123           | —   | QJ             |
| 2021/05/21 | 99.88  | 25.70 | 10            | 6.7 | 354           | —   | QJ             |
| 2021/06/10 | 101.92 | 24.35 | 8             | 5.6 | 100           | —   | QJ             |
| 2021/06/16 | 101.90 | 24.34 | 8             | 4.8 | 101           | —   | QJ             |
| 2021/06/28 | 101.89 | 24.31 | 8             | 4.9 | 101           | —   | QJ             |
| 2021/11/16 | 101.68 | 22.32 | 10            | 5.2 | 213           | 135 | QJ/WN          |
| 2021/12/24 | 101.68 | 22.34 | 10            | 6.6 | 211           | 133 | QJ/WN          |
| 2022/03/05 | 101.63 | 22.37 | 8             | 4.8 | 191           | 131 | QJ/WN          |
| 2022/07/22 | 99.90  | 21.10 | 10            | 6.2 | 434           | 338 | QJ/WN          |
| 2022/09/05 | 102.09 | 29.59 | 16            | 6.8 | 632           | 676 | QJ/WN          |
| 2022/11/19 | 102.29 | 23.40 | 8             | 5.4 | 79            | 42  | QJ/WN          |
| 2022/11/21 | 102.27 | 23.43 | 14            | 4.1 | —             | 39  | WN             |
| 2023/03/03 | 102.60 | 22.55 | 10            | 4.6 | 156           | 129 | QJ/WN          |
| 2023/03/23 | 100.69 | 22.62 | 10            | 4.7 | —             | 159 | WN             |
| 2023/05/31 | 102.65 | 24.20 | 16            | 4.0 | 33            | 108 | QJ/WN          |
| 2023/08/13 | 101.86 | 24.32 | 10            | 4.8 | 104           | 89  | QJ/WN          |
| 2023/11/17 | 99.35  | 21.20 | 10            | 6.2 | 467           | 368 | QJ/WN          |

“—” means no data.

60 **Table S2: Model performance metrics (NA, NB, NC, FAR, MAR, POD, TS) under varying parameters p1 and p3 for Na<sup>+</sup> at Qujiang spring.**

| p1 | p3   | NB | NA | NA+NC | FAR  | MAR         | POD         | TS   |
|----|------|----|----|-------|------|-------------|-------------|------|
| 1  | 1    | 19 | 20 | 22    | 0.49 | <b>0.09</b> | <b>0.91</b> | 0.49 |
| 1  | 1.01 | 12 | 18 | 22    | 0.40 | 0.18        | 0.82        | 0.53 |
| 1  | 1.02 | 6  | 14 | 22    | 0.30 | 0.36        | 0.64        | 0.50 |
| 1  | 1.03 | 5  | 11 | 22    | 0.31 | 0.50        | 0.50        | 0.41 |

|      |      |    |    |    |             |      |      |             |
|------|------|----|----|----|-------------|------|------|-------------|
| 1    | 1.04 | 4  | 9  | 22 | 0.31        | 0.59 | 0.41 | 0.35        |
| 1    | 1.05 | 3  | 7  | 22 | 0.30        | 0.68 | 0.32 | 0.28        |
| 1    | 1.06 | 2  | 5  | 22 | 0.29        | 0.77 | 0.23 | 0.21        |
| 1    | 1.07 | 1  | 4  | 22 | 0.20        | 0.82 | 0.18 | 0.17        |
| 1    | 1.08 | 1  | 4  | 22 | 0.20        | 0.82 | 0.18 | 0.17        |
| 1.01 | 1    | 14 | 19 | 22 | 0.42        | 0.14 | 0.86 | 0.53        |
| 1.01 | 1.01 | 8  | 16 | 22 | 0.33        | 0.27 | 0.73 | 0.53        |
| 1.01 | 1.02 | 5  | 12 | 22 | 0.29        | 0.45 | 0.55 | 0.44        |
| 1.01 | 1.03 | 5  | 5  | 22 | 0.50        | 0.77 | 0.23 | 0.19        |
| 1.01 | 1.04 | 4  | 6  | 22 | 0.40        | 0.73 | 0.27 | 0.23        |
| 1.01 | 1.05 | 1  | 6  | 22 | <b>0.14</b> | 0.73 | 0.27 | 0.26        |
| 1.01 | 1.06 | 1  | 5  | 22 | 0.17        | 0.77 | 0.23 | 0.22        |
| 1.01 | 1.07 | 1  | 4  | 22 | 0.20        | 0.82 | 0.18 | 0.17        |
| 1.01 | 1.08 | 1  | 2  | 22 | 0.33        | 0.91 | 0.09 | 0.09        |
| 1.02 | 1    | 8  | 16 | 22 | 0.33        | 0.27 | 0.73 | 0.53        |
| 1.02 | 1.01 | 4  | 14 | 22 | 0.22        | 0.36 | 0.64 | <b>0.54</b> |
| 1.02 | 1.02 | 4  | 11 | 22 | 0.27        | 0.50 | 0.50 | 0.42        |
| 1.02 | 1.03 | 4  | 7  | 22 | 0.36        | 0.68 | 0.32 | 0.27        |
| 1.02 | 1.04 | 2  | 6  | 22 | 0.25        | 0.73 | 0.27 | 0.25        |
| 1.02 | 1.05 | 1  | 5  | 22 | 0.17        | 0.77 | 0.23 | 0.22        |
| 1.02 | 1.06 | 1  | 5  | 22 | 0.17        | 0.77 | 0.23 | 0.22        |
| 1.02 | 1.07 | 1  | 4  | 22 | 0.20        | 0.82 | 0.18 | 0.17        |
| 1.02 | 1.08 | 1  | 2  | 22 | 0.33        | 0.91 | 0.09 | 0.09        |
| 1.03 | 1    | 4  | 13 | 22 | 0.24        | 0.41 | 0.59 | 0.50        |
| 1.03 | 1.01 | 4  | 12 | 22 | 0.25        | 0.45 | 0.55 | 0.46        |
| 1.03 | 1.02 | 2  | 10 | 22 | 0.17        | 0.55 | 0.45 | 0.42        |
| 1.03 | 1.03 | 2  | 6  | 22 | 0.25        | 0.73 | 0.27 | 0.25        |
| 1.03 | 1.04 | 2  | 6  | 22 | 0.25        | 0.73 | 0.27 | 0.25        |
| 1.03 | 1.05 | 1  | 5  | 22 | 0.17        | 0.77 | 0.23 | 0.22        |
| 1.03 | 1.06 | 1  | 5  | 22 | 0.17        | 0.77 | 0.23 | 0.22        |
| 1.03 | 1.07 | 1  | 3  | 22 | 0.25        | 0.86 | 0.14 | 0.13        |
| 1.03 | 1.08 | 1  | 2  | 22 | 0.33        | 0.91 | 0.09 | 0.09        |
| 1.04 | 1    | 2  | 10 | 22 | 0.17        | 0.55 | 0.45 | 0.42        |
| 1.04 | 1.01 | 2  | 8  | 22 | 0.20        | 0.64 | 0.36 | 0.33        |
| 1.04 | 1.02 | 2  | 7  | 22 | 0.22        | 0.68 | 0.32 | 0.29        |
| 1.04 | 1.03 | 2  | 6  | 22 | 0.25        | 0.73 | 0.27 | 0.25        |
| 1.04 | 1.04 | 2  | 5  | 22 | 0.29        | 0.77 | 0.23 | 0.21        |
| 1.04 | 1.05 | 1  | 5  | 22 | 0.17        | 0.77 | 0.23 | 0.22        |
| 1.04 | 1.06 | 1  | 5  | 22 | 0.17        | 0.77 | 0.23 | 0.22        |
| 1.04 | 1.07 | 1  | 3  | 22 | 0.25        | 0.86 | 0.14 | 0.13        |
| 1.04 | 1.08 | 1  | 2  | 22 | 0.33        | 0.91 | 0.09 | 0.09        |
| 1.05 | 1    | 2  | 6  | 22 | 0.25        | 0.73 | 0.27 | 0.25        |
| 1.05 | 1.01 | 2  | 6  | 22 | 0.25        | 0.73 | 0.27 | 0.25        |
| 1.05 | 1.02 | 2  | 6  | 22 | 0.25        | 0.73 | 0.27 | 0.25        |

|      |      |   |   |    |      |      |      |      |
|------|------|---|---|----|------|------|------|------|
| 1.05 | 1.03 | 2 | 6 | 22 | 0.25 | 0.73 | 0.27 | 0.25 |
| 1.05 | 1.04 | 2 | 5 | 22 | 0.29 | 0.77 | 0.23 | 0.21 |
| 1.05 | 1.05 | 1 | 5 | 22 | 0.17 | 0.77 | 0.23 | 0.22 |
| 1.05 | 1.06 | 1 | 5 | 22 | 0.17 | 0.77 | 0.23 | 0.22 |
| 1.05 | 1.07 | 1 | 3 | 22 | 0.25 | 0.86 | 0.14 | 0.13 |
| 1.05 | 1.08 | 1 | 2 | 22 | 0.33 | 0.91 | 0.09 | 0.09 |
| 1.06 | 1    | 2 | 5 | 22 | 0.29 | 0.77 | 0.23 | 0.21 |
| 1.06 | 1.01 | 2 | 5 | 22 | 0.29 | 0.77 | 0.23 | 0.21 |
| 1.06 | 1.02 | 2 | 5 | 22 | 0.29 | 0.77 | 0.23 | 0.21 |
| 1.06 | 1.03 | 2 | 5 | 22 | 0.29 | 0.77 | 0.23 | 0.21 |
| 1.06 | 1.04 | 2 | 4 | 22 | 0.33 | 0.82 | 0.18 | 0.17 |
| 1.06 | 1.05 | 1 | 4 | 22 | 0.20 | 0.82 | 0.18 | 0.17 |
| 1.06 | 1.06 | 1 | 4 | 22 | 0.20 | 0.82 | 0.18 | 0.17 |
| 1.06 | 1.07 | 1 | 3 | 22 | 0.25 | 0.86 | 0.14 | 0.13 |
| 1.06 | 1.08 | 1 | 2 | 22 | 0.33 | 0.91 | 0.09 | 0.09 |

**Table S3: Model performance metrics (NA, NB, NC, FAR, MAR, POD, TS) under varying parameters p1 and p3 for SO<sub>4</sub><sup>2-</sup> at Wana spring.**

| p1   | p3   | NB | NA | NA+NC | FAR  | MAR         | POD         | TS   |
|------|------|----|----|-------|------|-------------|-------------|------|
| 1    | 1    | 12 | 10 | 12    | 0.55 | <b>0.17</b> | <b>0.83</b> | 0.42 |
| 1    | 1.01 | 11 | 10 | 12    | 0.52 | <b>0.17</b> | <b>0.83</b> | 0.43 |
| 1    | 1.02 | 11 | 10 | 12    | 0.52 | <b>0.17</b> | <b>0.83</b> | 0.43 |
| 1    | 1.03 | 11 | 10 | 12    | 0.52 | <b>0.17</b> | <b>0.83</b> | 0.43 |
| 1    | 1.04 | 9  | 8  | 12    | 0.53 | 0.33        | 0.67        | 0.38 |
| 1    | 1.05 | 8  | 8  | 12    | 0.50 | 0.33        | 0.67        | 0.40 |
| 1    | 1.06 | 7  | 8  | 12    | 0.47 | 0.33        | 0.67        | 0.42 |
| 1    | 1.07 | 7  | 6  | 12    | 0.54 | 0.50        | 0.50        | 0.32 |
| 1    | 1.08 | 6  | 6  | 12    | 0.50 | 0.50        | 0.50        | 0.33 |
| 1.01 | 1    | 11 | 10 | 12    | 0.52 | <b>0.17</b> | <b>0.83</b> | 0.43 |
| 1.01 | 1.01 | 11 | 10 | 12    | 0.52 | <b>0.17</b> | <b>0.83</b> | 0.43 |
| 1.01 | 1.02 | 10 | 10 | 12    | 0.50 | <b>0.17</b> | <b>0.83</b> | 0.45 |
| 1.01 | 1.03 | 10 | 10 | 12    | 0.50 | <b>0.17</b> | <b>0.83</b> | 0.45 |
| 1.01 | 1.04 | 8  | 8  | 12    | 0.50 | 0.33        | 0.67        | 0.40 |
| 1.01 | 1.05 | 8  | 8  | 12    | 0.50 | 0.33        | 0.67        | 0.40 |
| 1.01 | 1.06 | 7  | 8  | 12    | 0.47 | 0.33        | 0.67        | 0.42 |
| 1.01 | 1.07 | 7  | 6  | 12    | 0.54 | 0.50        | 0.50        | 0.32 |
| 1.01 | 1.08 | 6  | 6  | 12    | 0.50 | 0.50        | 0.50        | 0.33 |
| 1.02 | 1    | 10 | 10 | 12    | 0.50 | <b>0.17</b> | <b>0.83</b> | 0.45 |
| 1.02 | 1.01 | 10 | 10 | 12    | 0.50 | <b>0.17</b> | <b>0.83</b> | 0.45 |
| 1.02 | 1.02 | 10 | 10 | 12    | 0.50 | <b>0.17</b> | <b>0.83</b> | 0.45 |
| 1.02 | 1.03 | 10 | 10 | 12    | 0.50 | <b>0.17</b> | <b>0.83</b> | 0.45 |
| 1.02 | 1.04 | 8  | 8  | 12    | 0.50 | 0.33        | 0.67        | 0.40 |

|      |      |   |    |    |             |             |             |             |
|------|------|---|----|----|-------------|-------------|-------------|-------------|
| 1.02 | 1.05 | 8 | 8  | 12 | 0.50        | 0.33        | 0.67        | 0.40        |
| 1.02 | 1.06 | 7 | 8  | 12 | 0.47        | 0.33        | 0.67        | 0.42        |
| 1.02 | 1.07 | 7 | 6  | 12 | 0.54        | 0.50        | 0.50        | 0.32        |
| 1.02 | 1.08 | 6 | 6  | 12 | 0.50        | 0.50        | 0.50        | 0.33        |
| 1.03 | 1    | 9 | 10 | 12 | 0.47        | <b>0.17</b> | <b>0.83</b> | 0.48        |
| 1.03 | 1.01 | 8 | 10 | 12 | 0.44        | <b>0.17</b> | <b>0.83</b> | 0.50        |
| 1.03 | 1.02 | 7 | 9  | 12 | 0.44        | 0.25        | 0.75        | 0.47        |
| 1.03 | 1.03 | 7 | 9  | 12 | 0.44        | 0.25        | 0.75        | 0.47        |
| 1.03 | 1.04 | 7 | 8  | 12 | 0.47        | 0.33        | 0.67        | 0.42        |
| 1.03 | 1.05 | 7 | 8  | 12 | 0.47        | 0.33        | 0.67        | 0.42        |
| 1.03 | 1.06 | 6 | 8  | 12 | 0.43        | 0.33        | 0.67        | 0.44        |
| 1.03 | 1.07 | 6 | 6  | 12 | 0.50        | 0.50        | 0.50        | 0.33        |
| 1.03 | 1.08 | 5 | 6  | 12 | 0.45        | 0.50        | 0.50        | 0.35        |
| 1.04 | 1    | 9 | 10 | 12 | 0.47        | <b>0.17</b> | <b>0.83</b> | 0.48        |
| 1.04 | 1.01 | 7 | 10 | 12 | <b>0.41</b> | <b>0.17</b> | <b>0.83</b> | <b>0.53</b> |
| 1.04 | 1.02 | 7 | 9  | 12 | 0.44        | 0.25        | 0.75        | 0.47        |
| 1.04 | 1.03 | 7 | 9  | 12 | 0.44        | 0.25        | 0.75        | 0.47        |
| 1.04 | 1.04 | 7 | 8  | 12 | 0.47        | 0.33        | 0.67        | 0.42        |
| 1.04 | 1.05 | 7 | 8  | 12 | 0.47        | 0.33        | 0.67        | 0.42        |
| 1.04 | 1.06 | 6 | 8  | 12 | 0.43        | 0.33        | 0.67        | 0.44        |
| 1.04 | 1.07 | 6 | 6  | 12 | 0.50        | 0.50        | 0.50        | 0.33        |
| 1.04 | 1.08 | 5 | 6  | 12 | 0.45        | 0.50        | 0.50        | 0.35        |
| 1.05 | 1    | 9 | 9  | 12 | 0.50        | 0.25        | 0.75        | 0.43        |
| 1.05 | 1.01 | 8 | 9  | 12 | 0.47        | 0.25        | 0.75        | 0.45        |
| 1.05 | 1.02 | 8 | 9  | 12 | 0.47        | 0.25        | 0.75        | 0.45        |
| 1.05 | 1.03 | 7 | 9  | 12 | 0.44        | 0.25        | 0.75        | 0.47        |
| 1.05 | 1.04 | 7 | 8  | 12 | 0.47        | 0.33        | 0.67        | 0.42        |
| 1.05 | 1.05 | 7 | 8  | 12 | 0.47        | 0.33        | 0.67        | 0.42        |
| 1.05 | 1.06 | 6 | 8  | 12 | 0.43        | 0.33        | 0.67        | 0.44        |
| 1.05 | 1.07 | 6 | 6  | 12 | 0.50        | 0.50        | 0.50        | 0.33        |
| 1.05 | 1.08 | 5 | 6  | 12 | 0.45        | 0.50        | 0.50        | 0.35        |
| 1.06 | 1    | 7 | 8  | 12 | 0.47        | 0.33        | 0.67        | 0.42        |
| 1.06 | 1.01 | 7 | 8  | 12 | 0.47        | 0.33        | 0.67        | 0.42        |
| 1.06 | 1.02 | 6 | 7  | 12 | 0.46        | 0.42        | 0.58        | 0.39        |
| 1.06 | 1.03 | 6 | 7  | 12 | 0.46        | 0.42        | 0.58        | 0.39        |
| 1.06 | 1.04 | 6 | 6  | 12 | 0.50        | 0.50        | 0.50        | 0.33        |
| 1.06 | 1.05 | 6 | 6  | 12 | 0.50        | 0.50        | 0.50        | 0.33        |
| 1.06 | 1.06 | 5 | 6  | 12 | 0.45        | 0.50        | 0.50        | 0.35        |
| 1.06 | 1.07 | 5 | 5  | 12 | 0.50        | 0.58        | 0.42        | 0.29        |
| 1.06 | 1.08 | 4 | 5  | 12 | 0.44        | 0.58        | 0.42        | 0.31        |

**Table S4: Parameters of anomaly detection models for each hydrochemical component.**

| Parameter              | Na <sup>+</sup> | K <sup>+</sup> | Ca <sup>2+</sup> | Cl <sup>-</sup> | SO <sub>4</sub> <sup>2-</sup> | HCO <sub>3</sub> <sup>-</sup> | F <sup>-</sup> | δD    | δ <sup>18</sup> O | Sites |
|------------------------|-----------------|----------------|------------------|-----------------|-------------------------------|-------------------------------|----------------|-------|-------------------|-------|
| p1                     | 1.02            | 1.05           | 1.04             | 1.04            | 1.01                          | 1.01                          | 1.06           | 0.994 | 0.989             | QJ    |
| p3                     | 1.01            | 1.01           | 1.04             | 1.02            | 1.02                          | 1.02                          | 1.01           | 0.997 | 0.997             |       |
| p1                     | 1.04            | 1.07           | 1.06             | 1.02            | 1.04                          | 1.06                          | 1.02           | 1.001 | 1.001             | WN    |
| p3                     | 1.02            | 1.04           | 1.01             | 1.03            | 1.01                          | 1.02                          | 1.01           | 1.002 | 1.002             |       |
| p2                     |                 |                |                  |                 | 18                            |                               |                |       |                   |       |
| p4                     |                 |                |                  |                 | 1.5                           |                               |                |       |                   |       |
| p5                     |                 |                |                  |                 | 1.6                           |                               |                |       |                   | QJ/WN |
| <i>T</i> <sub>th</sub> |                 |                |                  |                 | 45                            |                               |                |       |                   |       |

70 **Table S5: Model performance comparison across different numbers of synchronous anomalous components.**

| Components<br>(N) | Qujiang spring |      |      |      | Wana spring |      |      |      |
|-------------------|----------------|------|------|------|-------------|------|------|------|
|                   | POD            | FAR  | MAR  | TS   | POD         | FAR  | MAR  | TS   |
| N ≥ 2             | 1              | 0.37 | 0    | 0.63 | 1.00        | 0.43 | 0    | 0.57 |
| N ≥ 3             | 0.95           | 0.27 | 0.05 | 0.70 | 0.83        | 0.33 | 0.17 | 0.59 |
| N ≥ 4             | 0.77           | 0.29 | 0.23 | 0.59 | 0.75        | 0.31 | 0.25 | 0.56 |
| N ≥ 5             | 0.55           | 0.29 | 0.45 | 0.44 | 0.67        | 0.20 | 0.33 | 0.57 |
| N ≥ 6             | 0.36           | 0.11 | 0.64 | 0.35 | 0.58        | 0.13 | 0.42 | 0.54 |

**Table S6: Model performance evaluation and uncertainty analysis of hydrochemical components at Qujiang and Wana springs based on 1,000 bootstrap resamples.**

| Component       | Qujiang spring    |                   |                   | Wana spring       |                   |                   |
|-----------------|-------------------|-------------------|-------------------|-------------------|-------------------|-------------------|
|                 | POD (95% CI)      | FAR (95% CI)      | TS (95% CI)       | POD (95% CI)      | FAR (95% CI)      | TS (95% CI)       |
| Na <sup>+</sup> | 0.64 (0.43, 0.83) | 0.22 (0.05, 0.44) | 0.54 (0.35, 0.73) | 0.42 (0.17, 0.67) | 0.00 (0.00, 0.00) | 0.42 (0.17, 0.67) |

|                               |                   |                   |                   |                   |                   |                   |
|-------------------------------|-------------------|-------------------|-------------------|-------------------|-------------------|-------------------|
| K <sup>+</sup>                | 0.55 (0.35, 0.74) | 0.37 (0.18, 0.61) | 0.41(0.23, 0.57)  | 0.50 (0.22, 0.79) | 0.33 (0.07, 0.67) | 0.40 (0.13, 0.67) |
| Ca <sup>2+</sup>              | 0.73 (0.54, 0.91) | 0.36 (0.19, 0.60) | 0.52 (0.31, 0.69) | 0.75 (0.50, 1.00) | 0.36 (0.14, 0.63) | 0.53 (0.29, 0.76) |
| Cl <sup>-</sup>               | 0.77 (0.58, 0.95) | 0.37 (0.21, 0.58) | 0.53 (0.33, 0.70) | 0.75 (0.50, 1.00) | 0.36 (0.12, 0.60) | 0.53 (0.29, 0.76) |
| SO <sub>4</sub> <sup>2-</sup> | 0.59 (0.38, 0.79) | 0.28 (0.10, 0.50) | 0.48 (0.30, 0.67) | 0.83 (0.58, 1.00) | 0.41 (0.13, 0.62) | 0.53 (0.33, 0.78) |
| HCO <sub>3</sub> <sup>-</sup> | 0.41 (0.21, 0.62) | 0.44 (0.24, 0.71) | 0.31 (0.17, 0.47) | 0.58 (0.31, 0.86) | 0.22 (0.00, 0.50) | 0.50 (0.29, 0.79) |
| F <sup>-</sup>                | 0.55 (0.35, 0.75) | 0.43 (0.13, 0.56) | 0.39 (0.25, 0.61) | 0.58 (0.30, 0.86) | 0.36 (0.09, 0.67) | 0.44 (0.19, 0.69) |
| δD                            | 1.00 (1.00, 1.00) | 0.20 (0.00, 0.60) | 0.80 (0.40, 1.00) | 1.00 (1.00, 1.00) | 0.50 (0.20, 0.80) | 0.50 (0.20, 0.80) |
| δ <sup>18</sup> O             | 0.75 (0.25, 1.00) | 0.40 (0.00, 0.83) | 0.50 (0.17, 0.83) | 1.00 (1.00, 1.00) | 0.44 (0.11, 0.78) | 0.56 (0.22, 0.89) |
| DA                            | 0.95 (0.85, 1.00) | 0.28 (0.10, 0.45) | 0.70 (0.53, 0.87) | 0.83 (0.60, 1.00) | 0.33 (0.12, 0.60) | 0.59 (0.35, 0.82) |

Note: Values are original estimated metrics; values in parentheses are their corresponding 95% confidence intervals (CI).

75

**Table S7: Statistical analysis of anomalous variations in hydrochemical components.**

| Component                     | Qujiang spring           |                          |                   |                   | Wana spring              |                          |                   |                   |
|-------------------------------|--------------------------|--------------------------|-------------------|-------------------|--------------------------|--------------------------|-------------------|-------------------|
|                               | Increase<br>( <i>n</i> ) | Decrease<br>( <i>n</i> ) | Increase<br>Ratio | Decrease<br>Ratio | Increase<br>( <i>n</i> ) | Decrease<br>( <i>n</i> ) | Increase<br>Ratio | Decrease<br>Ratio |
| Na <sup>+</sup>               | 10                       | 4                        | 0.71              | 0.29              | 3                        | 1                        | 0.75              | 0.25              |
| K <sup>+</sup>                | 8                        | 4                        | 0.67              | 0.33              | 3                        | 2                        | 0.60              | 0.40              |
| Ca <sup>2+</sup>              | 10                       | 6                        | 0.63              | 0.38              | 4                        | 5                        | 0.44              | 0.56              |
| Cl <sup>-</sup>               | 11                       | 7                        | 0.61              | 0.39              | 6                        | 3                        | 0.67              | 0.33              |
| SO <sub>4</sub> <sup>2-</sup> | 10                       | 3                        | 0.77              | 0.23              | 5                        | 5                        | 0.50              | 0.50              |
| HCO <sub>3</sub> <sup>-</sup> | 6                        | 4                        | 0.60              | 0.40              | 5                        | 2                        | 0.71              | 0.29              |
| F <sup>-</sup>                | 11                       | 4                        | 0.73              | 0.27              | 4                        | 3                        | 0.57              | 0.43              |
| δD                            | 1                        | 3                        | 0.25              | 0.75              | 2                        | 3                        | 0.40              | 0.60              |
| δ <sup>18</sup> O             | 1                        | 2                        | 0.33              | 0.67              | 2                        | 3                        | 0.40              | 0.60              |

## References

- 80 Craig, H.: Isotopic Variations in Meteoric Waters, *Science*, 133(346), 1702-1703, <https://doi.org/10.1126/science.133.3465.1702>, 1961.
- Li, G., Zhang, X., Xu, Y., Song, S., Wang, Y., Ji, X., Xiang, J., and Yang, J.: Characteristics of Stable Isotopes in Precipitation and Their Moisture Sources in Mengzi Region, Southern Yunnan (in Chinese with English abstract), *Environmental Science*, 37(4), 1313-1320, <https://doi.org/10.13227/j.hjcx.2016.04.016>, 2016.

85
